# Supplementary material for: Electronic and optical properties of copper nanostructures for advanced applications
Source: Royal Society of Chemistry journal article supplement (doi:10.1039/d5nj01220a), 2025-01-01
Supplement: d5nj01220a1.pdf [file d5nj01220a1.pdf]

## Supplementary information

### Electronic and Optical Properties of Copper Nanostructures for Advanced Applications

Ragheb Khalil Bouriche<sup>a,b</sup>, Douniazed Hannachi<sup>c,d</sup>, Amel Messai<sup>a</sup>, Christophe Morell<sup>e</sup>, Amor Azizi<sup>b</sup>, Henry Chermette<sup>e\*</sup>

**A**

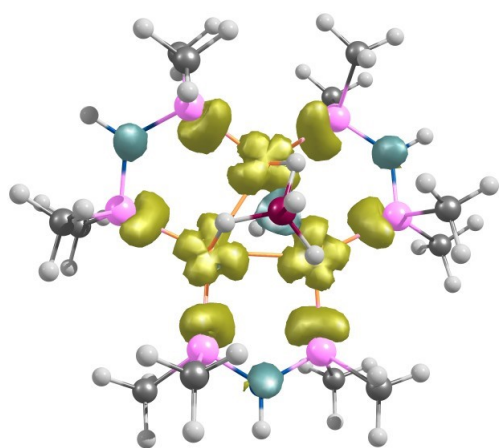

**S1**

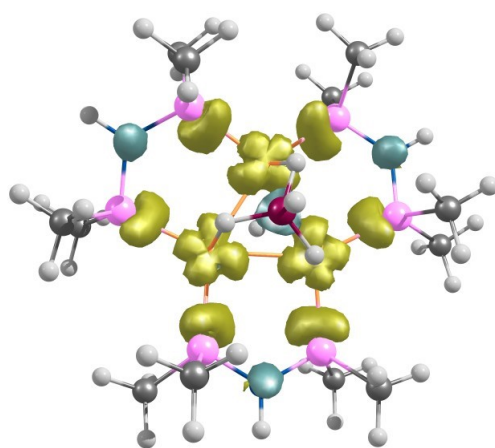

**S10**

**B**

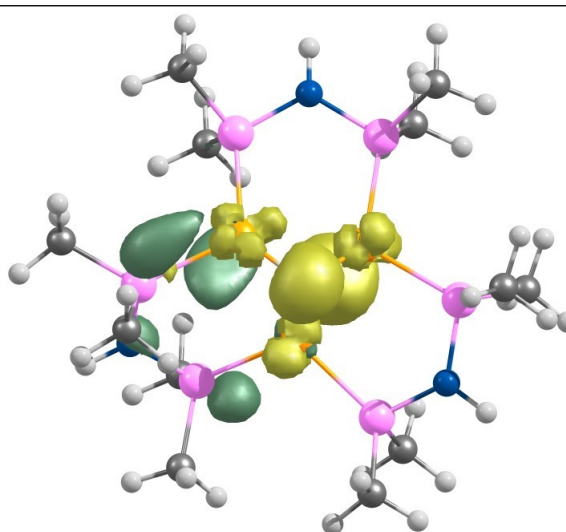

**S1**

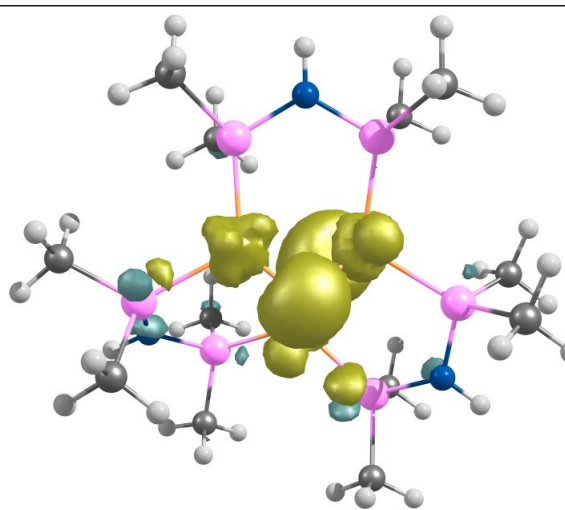

**S5**

**B**

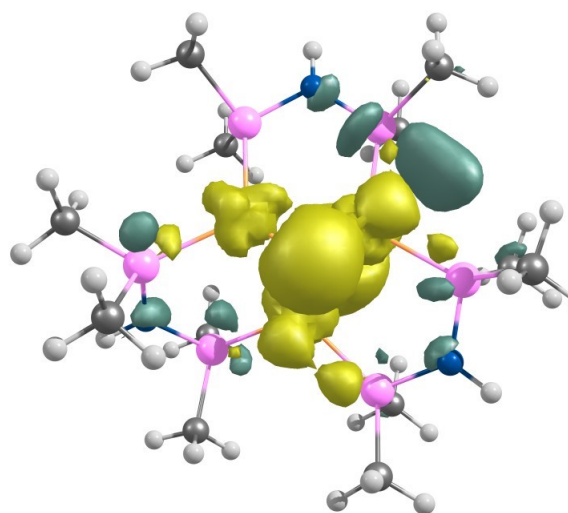

**S4**

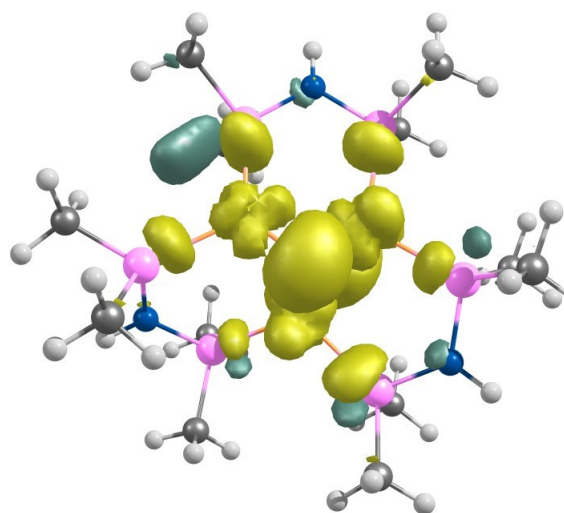

**S19**

**C**

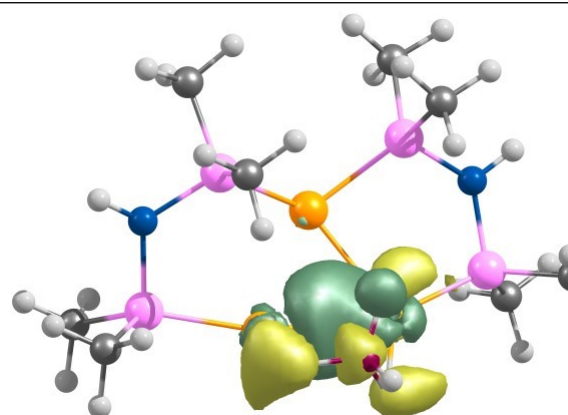

**S1**

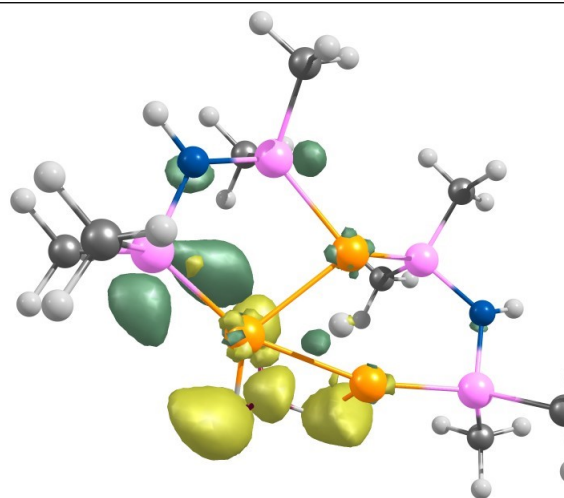

**S4**

**C**

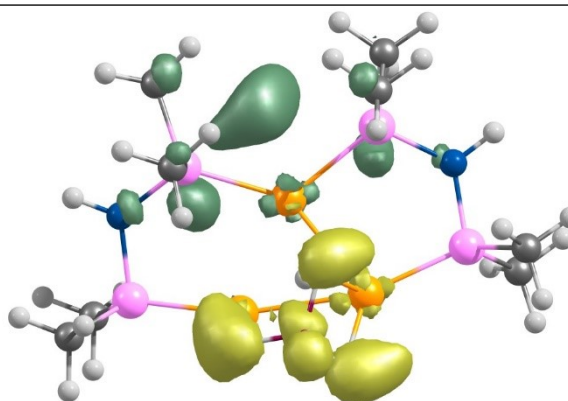

**S5**

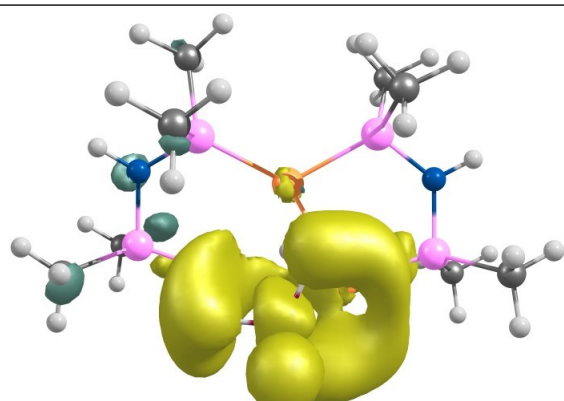

**S10**

**D**

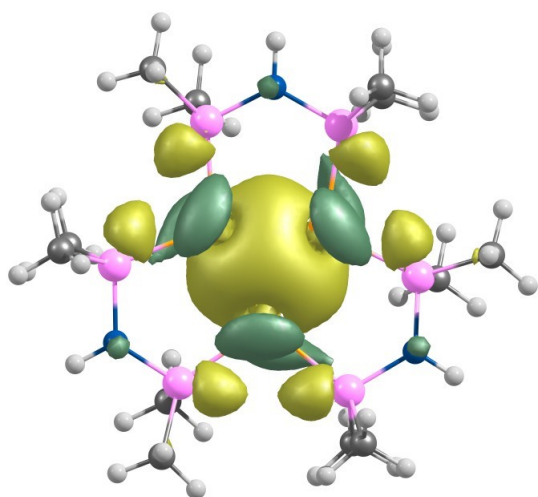

**S1**

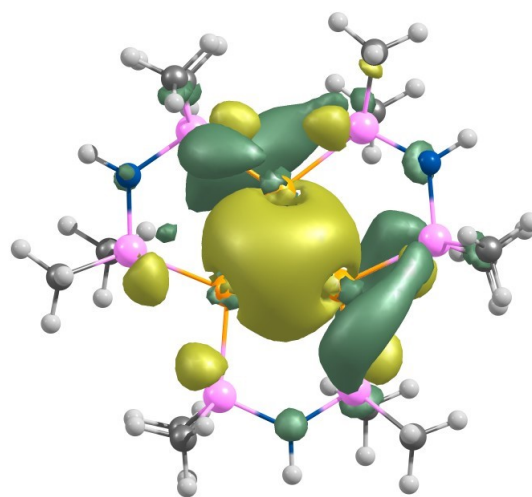

**S2**

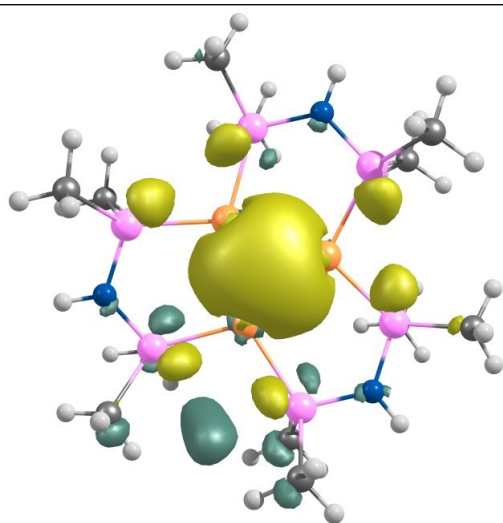

**S6**

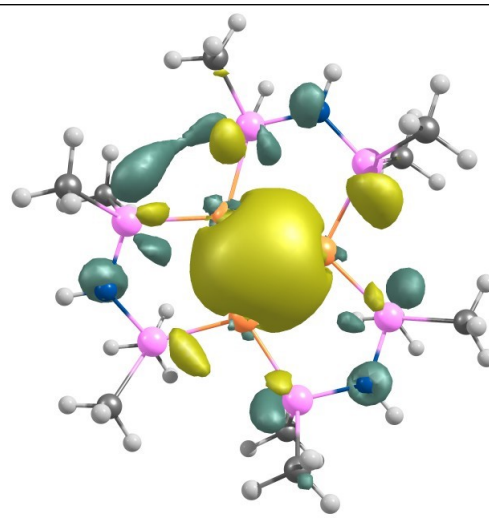

**S9**

**C**

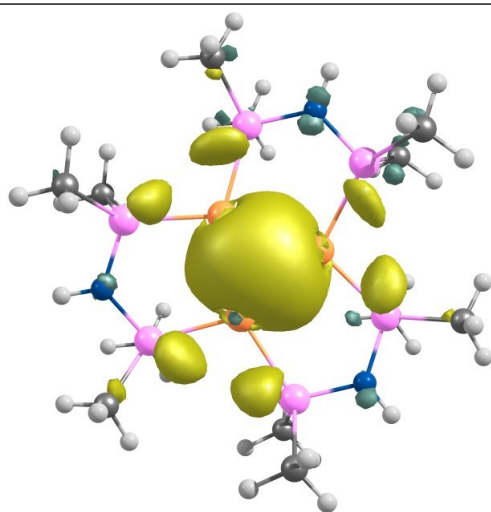

**S12**

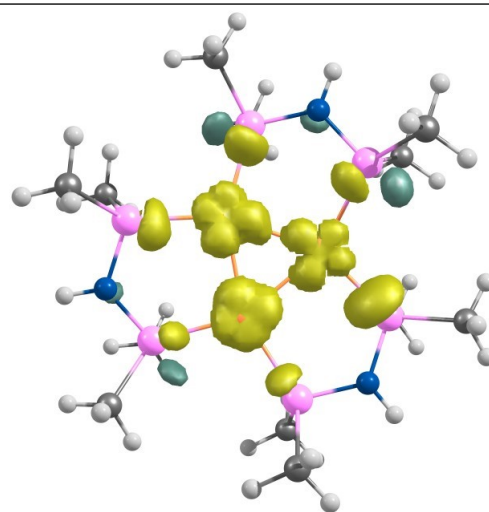

**S15**

**E**

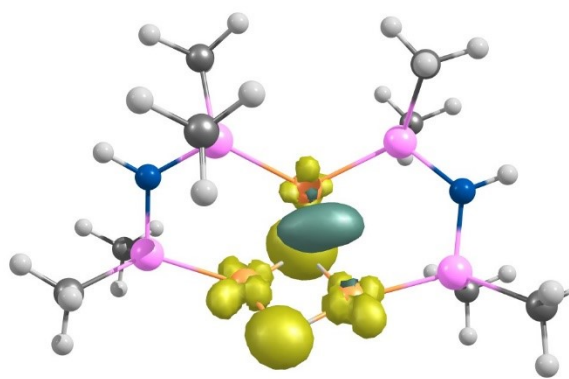

**S1**

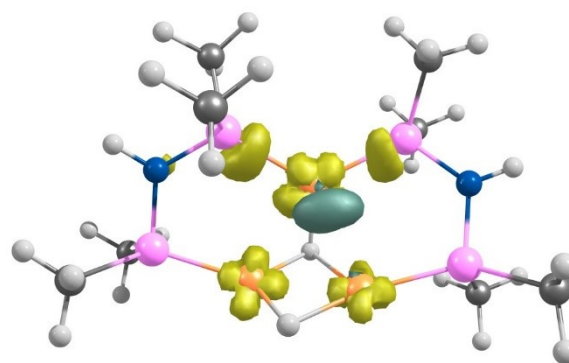

**S2**

**E**

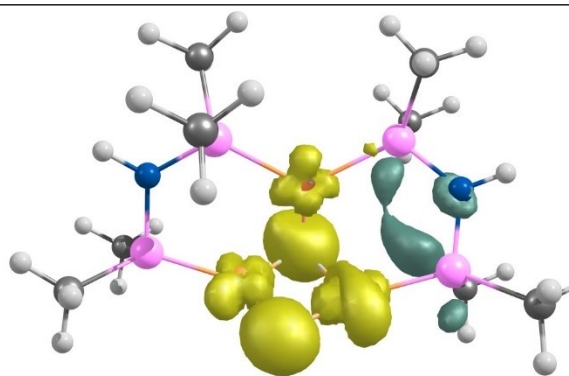

**S6**

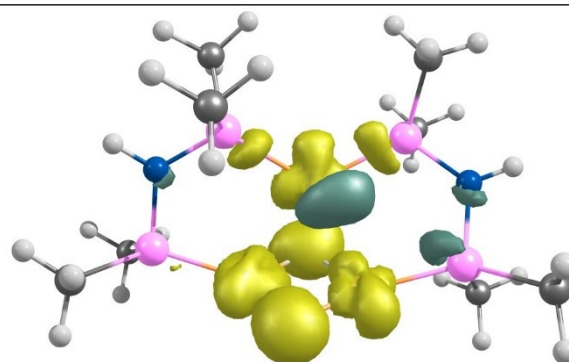

**S8**

**E**

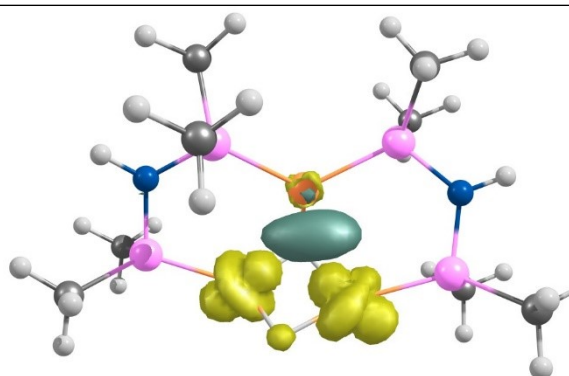

**S14**

**F**

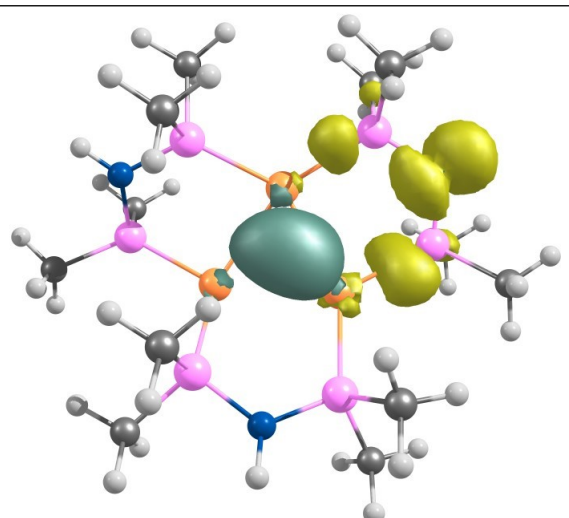

**S1**

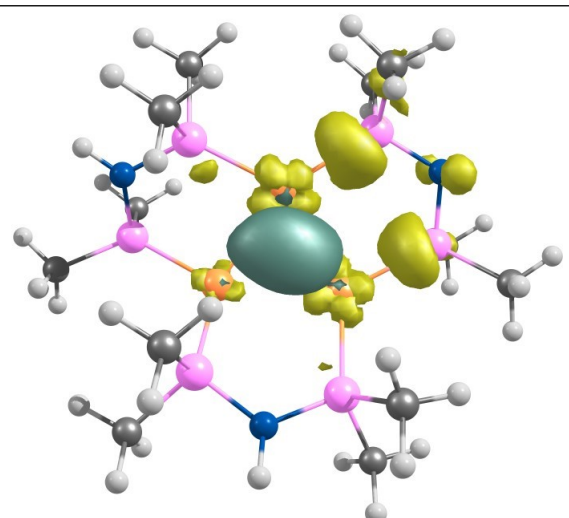

**S2**



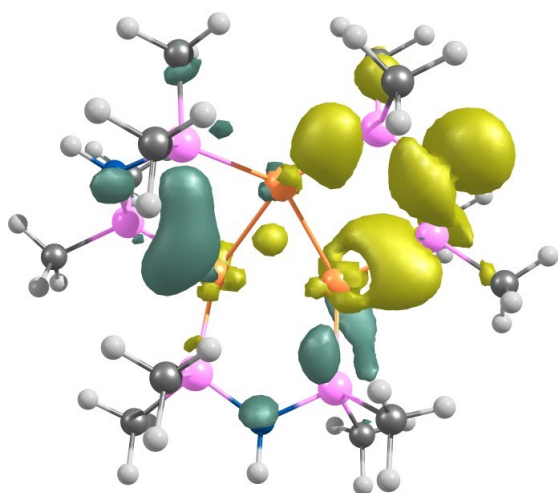

S6

G

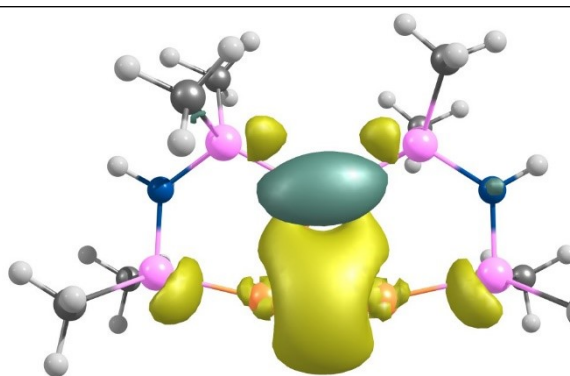

S1

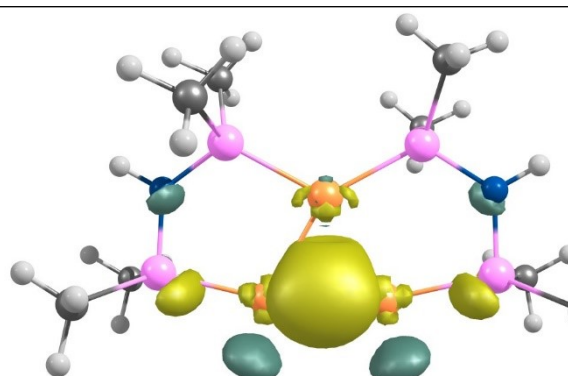

S2

G

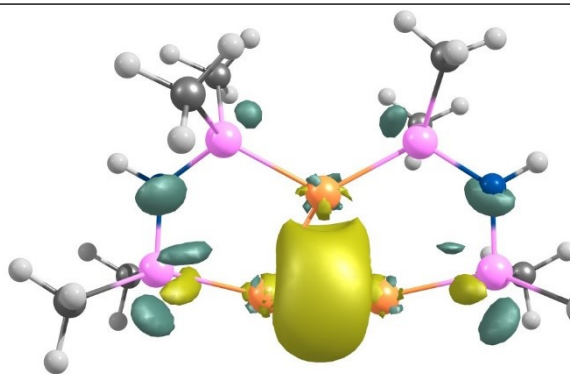

S4

H

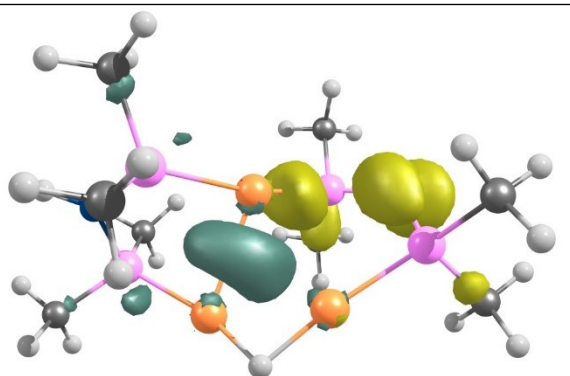

S1

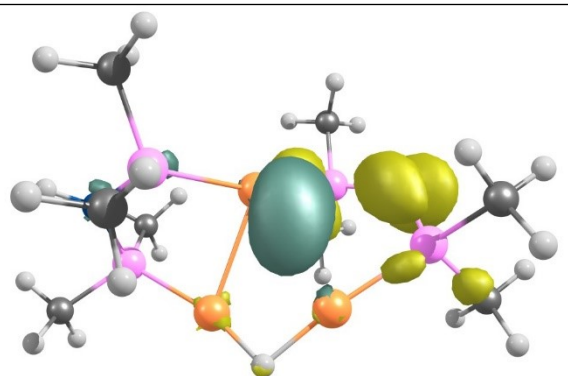

S2

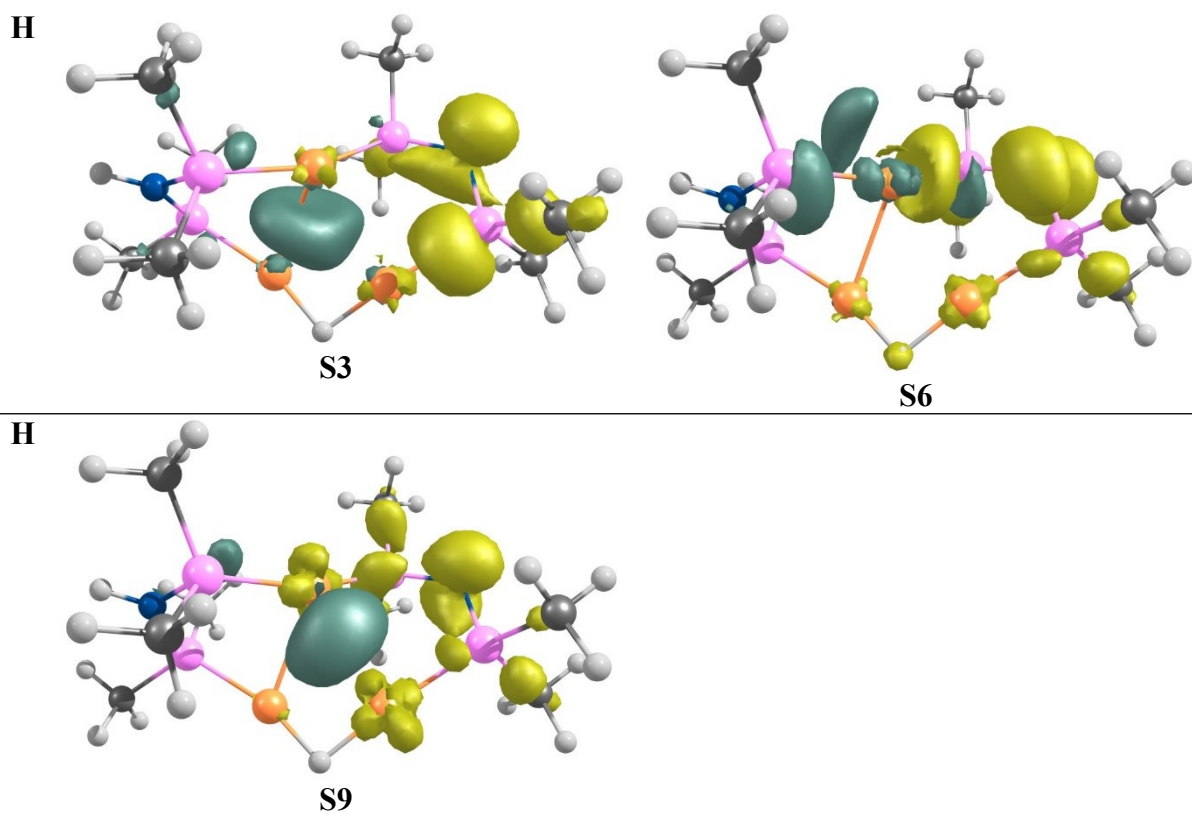

Figure S1 CDD for the crucial excited state of **A** to **H** nanoclusters. CDD was calculated as a difference between the corresponding excited state and the ground state of the considered system using the M06-2X/6-31+G(d)/SDD level of theory (yellow = negative density and green = positive density)

**A**

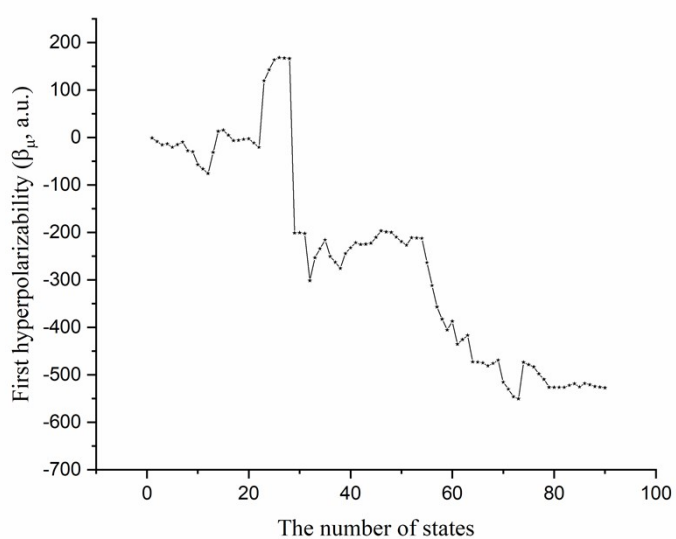

**B**

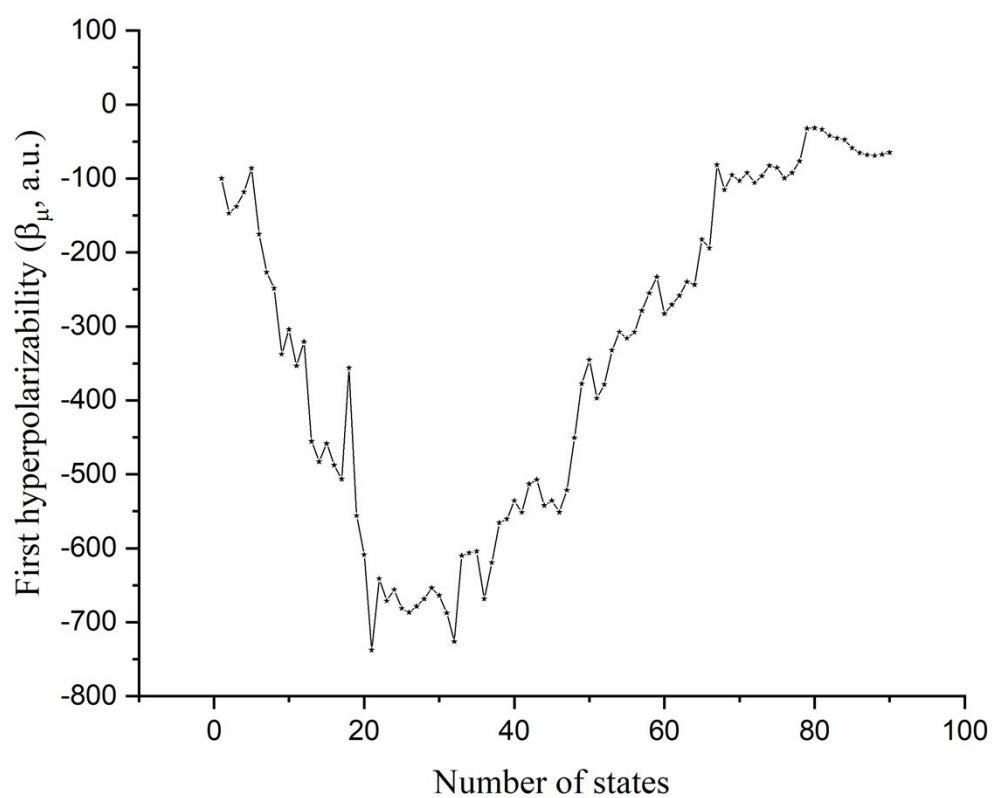

**C**

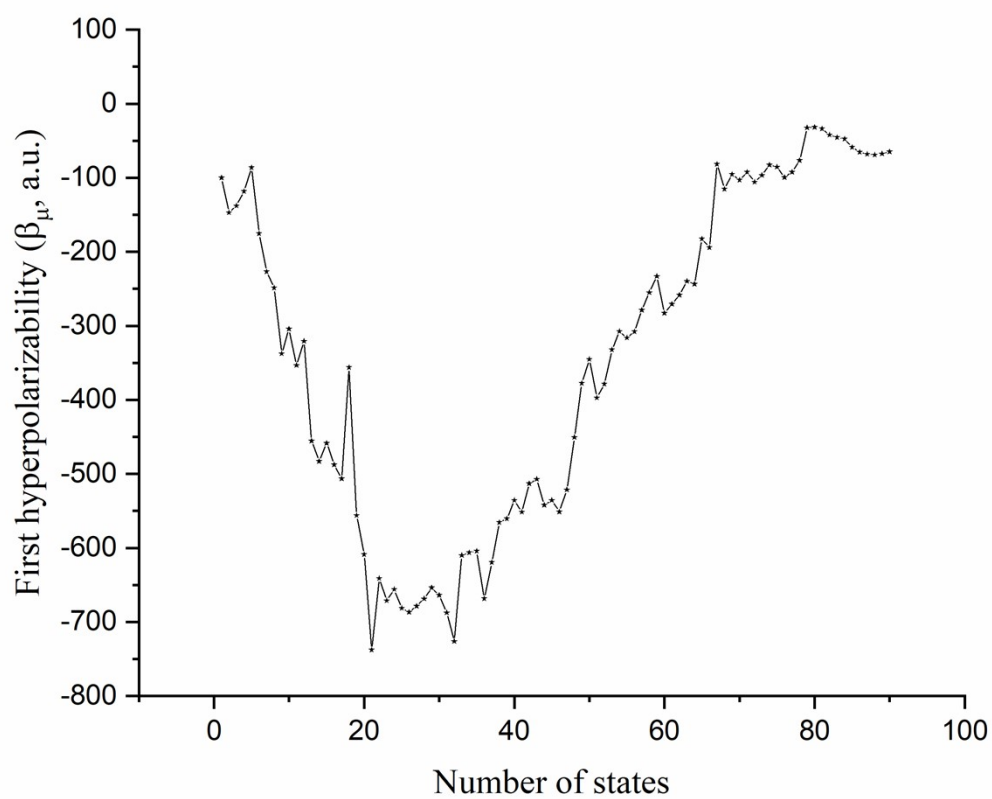

**D**

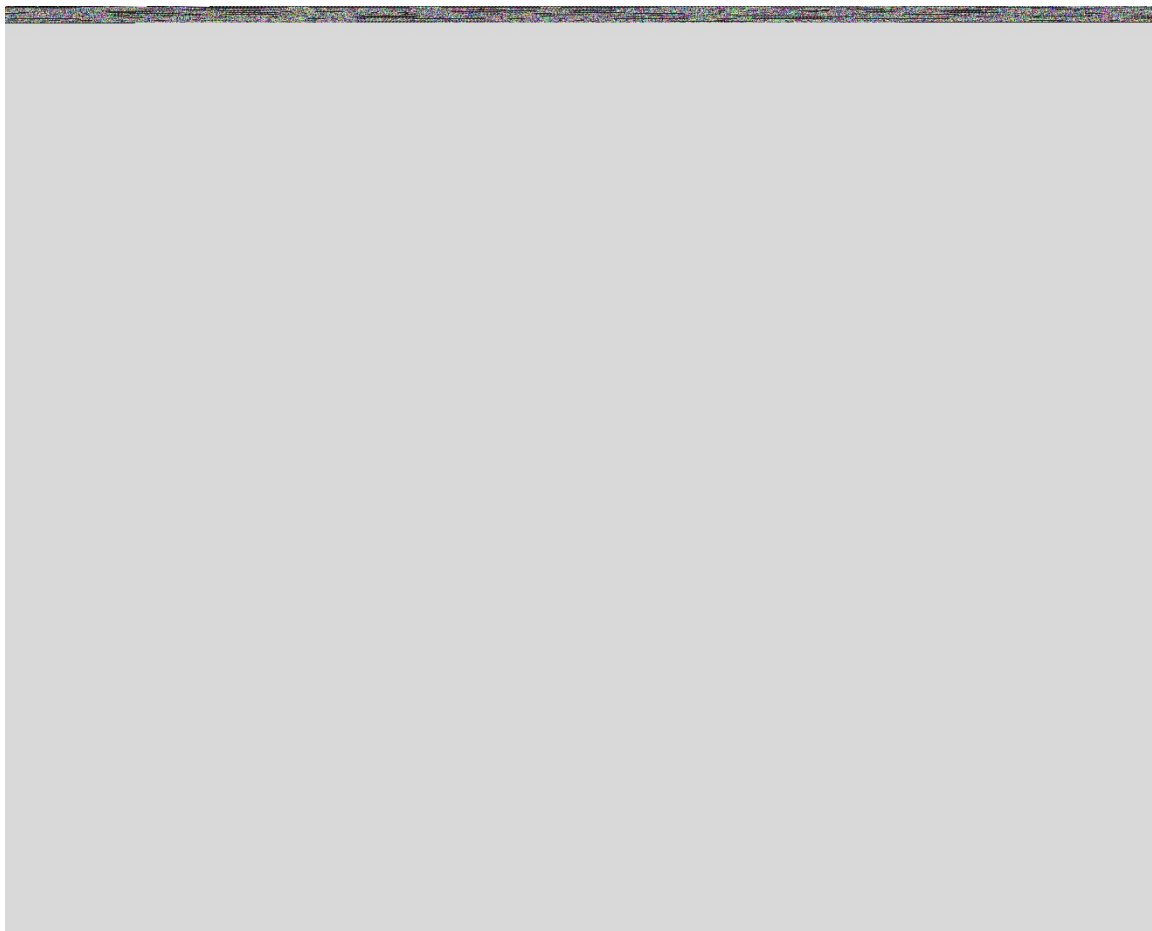

**E**

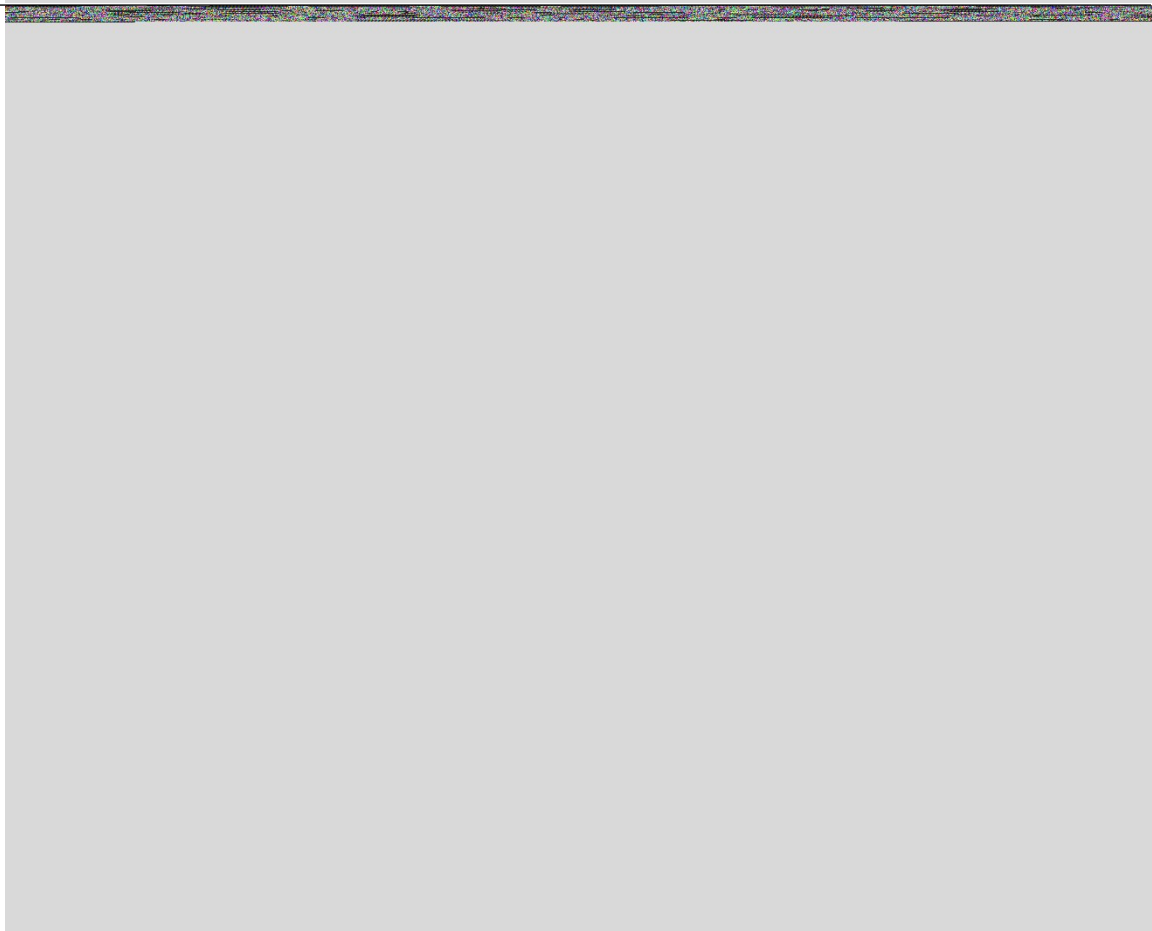



**F**

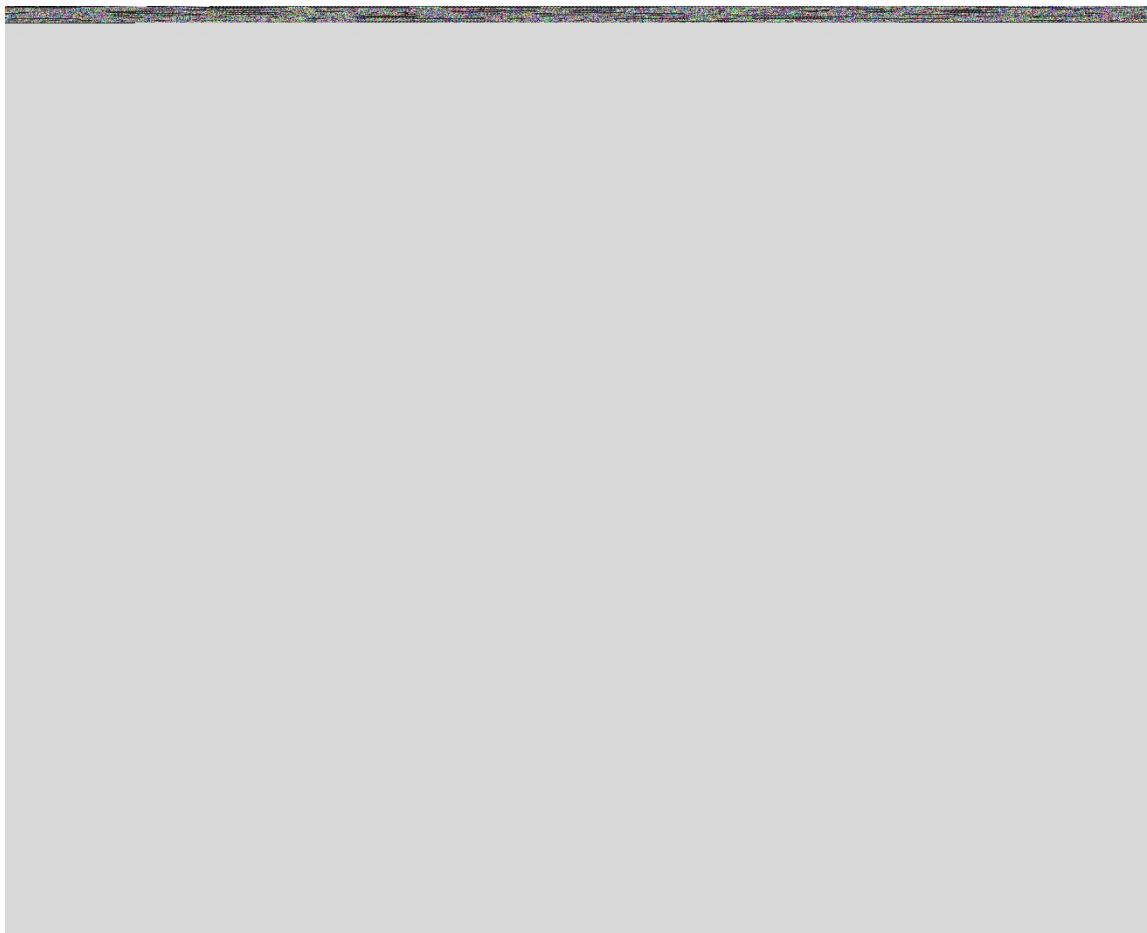

**G**

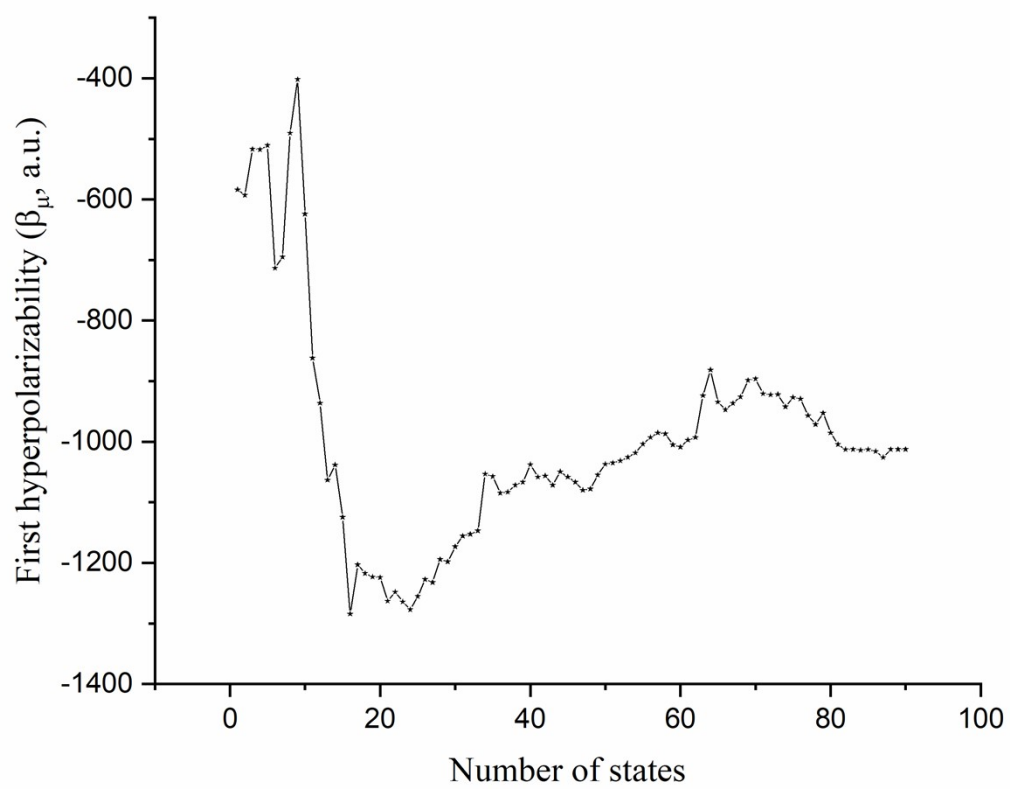

**H**

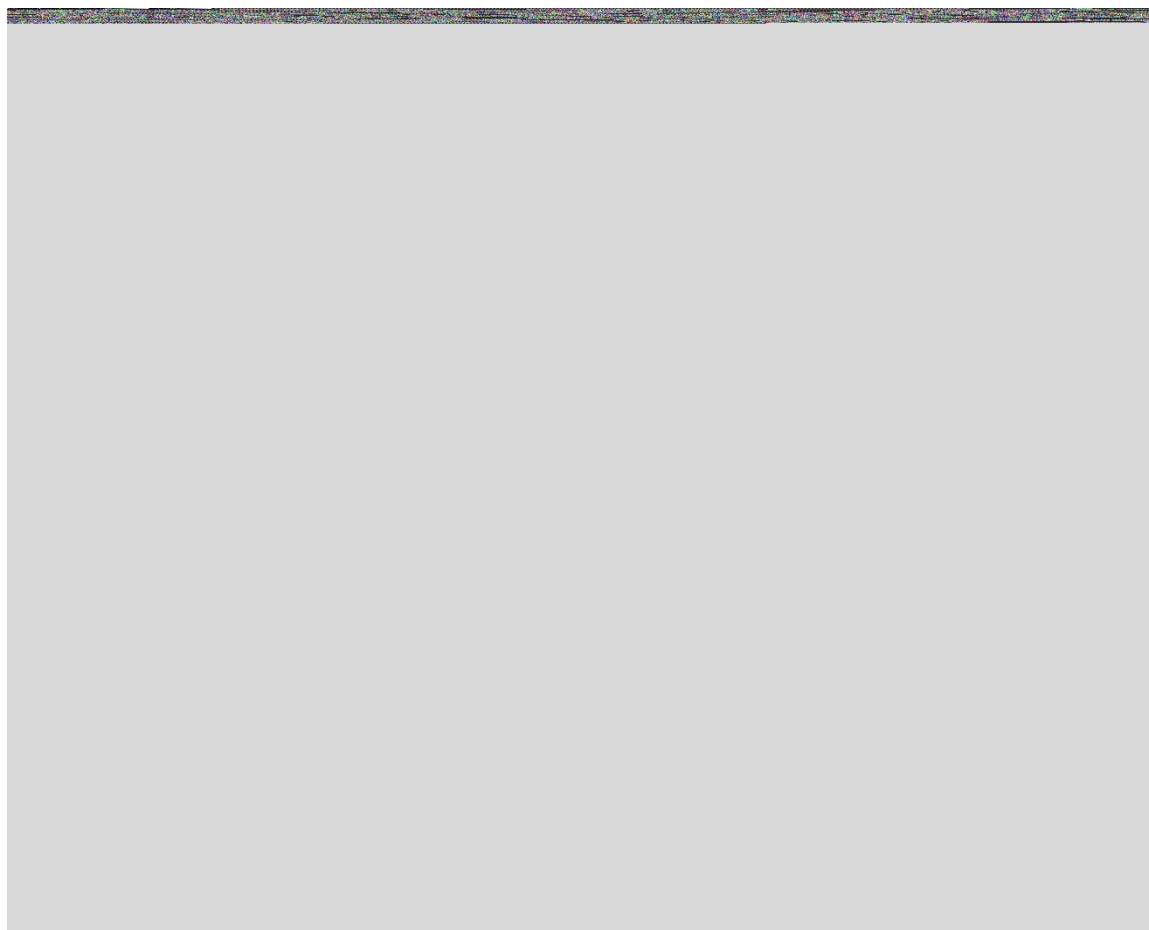

Figure S2 static first hyperpolarizability values calculated using the SOS formalism at the M06-2X/6-31+G(d)/SDD level of theory for **A** to **H** copper hydride nanoclusters
